# Supplementary material
Source: PubMed Central journal article supplement (PMC4474295)
Supplement: JVI.00625-15_zjv999090450so2.pdf [file JVI.00625-15_zjv999090450so2.pdf]

1 **Supplementary Movie 1: Live cell imaging of anterograde transport of gM-**  
2 **mCherry puncta in a Us9-null genetic background**

3 Rat SCG neurons were infected with PRV 437 and imaged at 8 hours post-  
4 infection. An mCherry-labeled puncta is observed undergoing anterograde  
5 transport. Numerous stalled mCherry puncta are also present.

6
